# Supplementary material for: A blood-brain barrier-penetrating AAV2 mutant created by a brain microvasculature endothelial cell-targeted AAV2 variant
Source: PubMed Central journal article supplement (PMC10036519; doi:10.1016/j.omtm.2023.02.016), 2023-03-02
Supplement: mmc1.pdf [file mmc1.pdf]

**OMTM, Volume 29**

**Supplemental information**

**A blood-brain barrier-penetrating AAV2 mutant  
created by a brain microvasculature  
endothelial cell-targeted AAV2 variant**

**Hayato Kawabata, Ayumu Konno, Yasunori Matsuzaki, and Hirokazu Hirai**

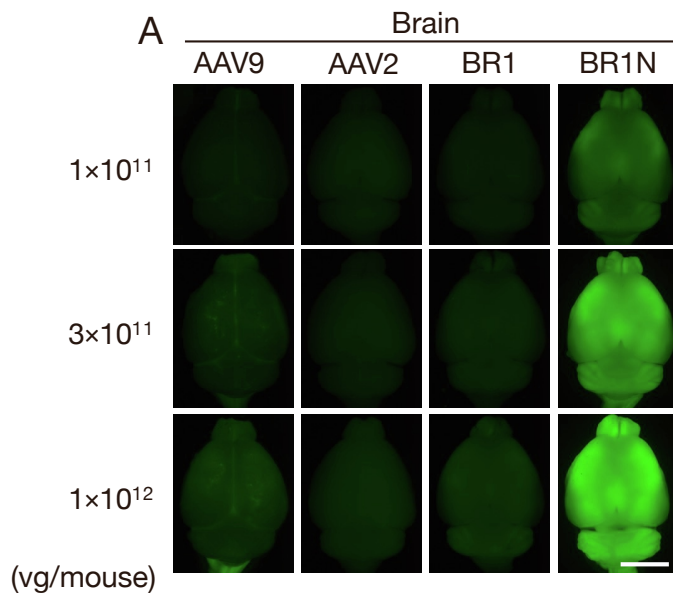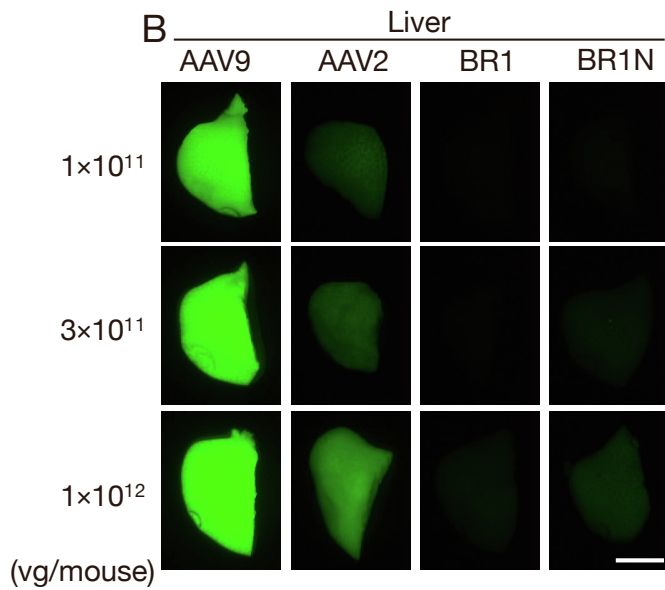

1

2 **Figure S1. Injection dose-dependent CNS tropism of BR1N.** C57BL/6 mice received intravenous  
 3 injection of AAV9, BR1, or BR1N expressing GFP under the control of the CBh promoter at a dose of  
 4  $1 \times 10^{11}$ ,  $3 \times 10^{11}$ , or  $1 \times 10^{12}$  vg/mouse. Three weeks after the AAV injection, GFP expression was  
 5 examined in the brain (**A**) and liver (**B**). Note the elevation of the GFP fluorescence in BR1N-treated  
 6 brains in an injected dose-dependent manner. Scale bar, 5 mm.

7

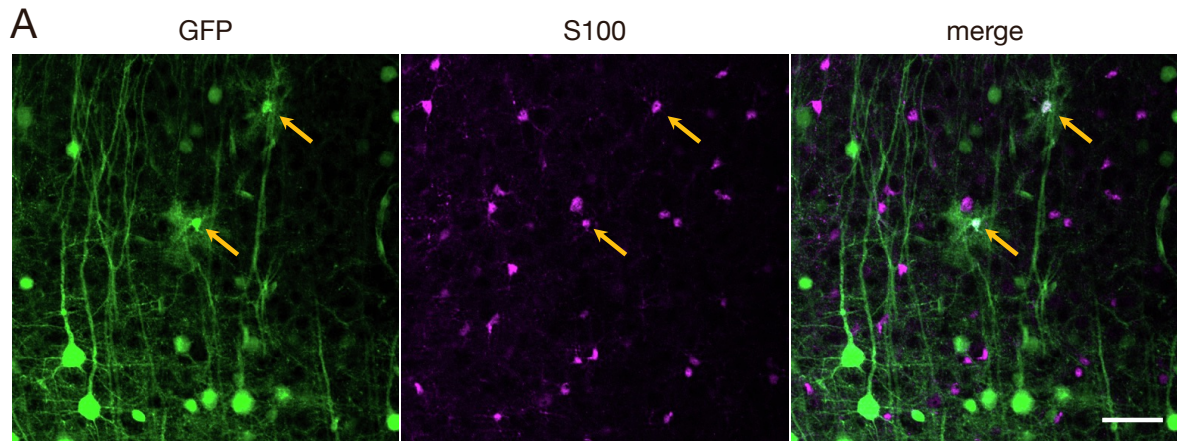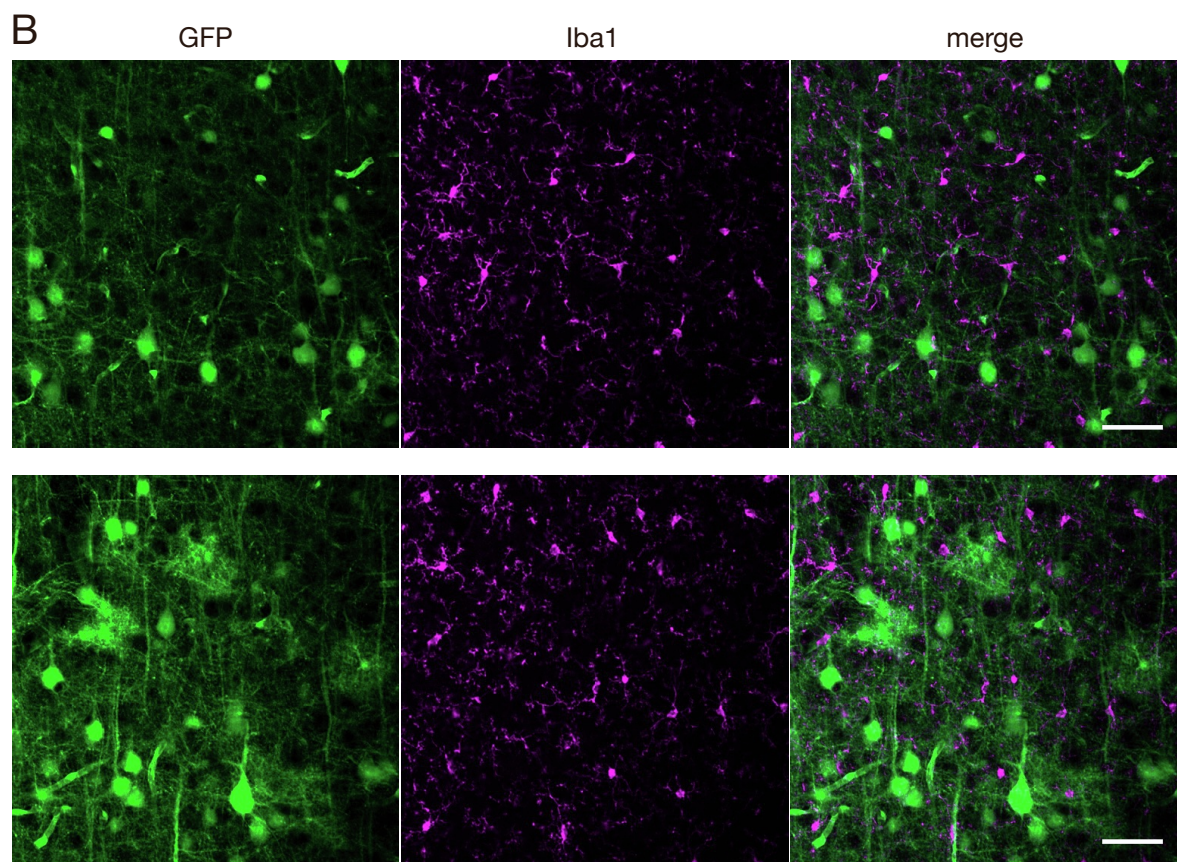

8

9 **Figure S2. Intravenous injection of BR1N transduces astrocytes, but not microglia.** C57BL/6 mice  
 10 received intravenous injection of BR1N expressing GFP under the control of the CBh promoter at a  
 11 dose of  $1 \times 10^{11}$  vg/mouse. Three weeks after the AAV injection, sagittal sections of the brain were  
 12 immunolabeled for astrocyte marker S100 (A) or microglia marker Iba1 (B). Yellow arrows show GFP  
 13 and S100 double positive cells. Scale bar, 100  $\mu$ m.

14

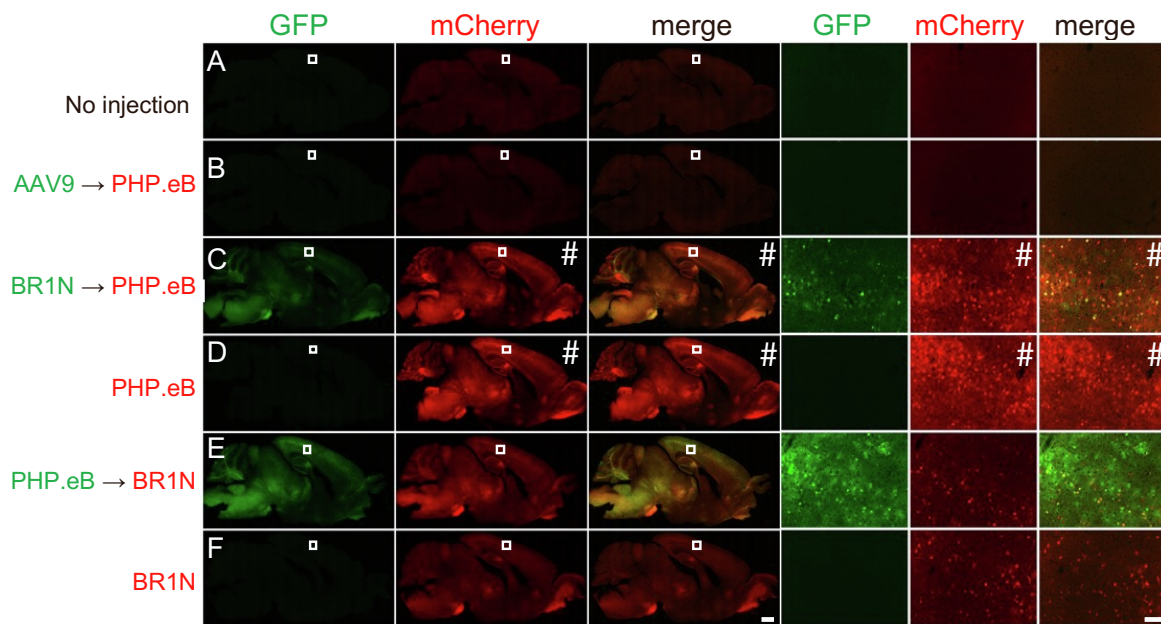

15

16 **Figure S3. No cross-reaction of NAbs between AAV9 and BR1N with 1-week interval.** C57BL/6

17 mice received systemic AAV injections twice with a 1-week interval: first injection (AAVs expressing

18 GFP) was aimed to produce NAbs, whereas second injection used different capsid AAVs expressing

19 mCherry to test the cross-reactivity of the NAbs produced by the 1<sup>st</sup> AAV injection. Mice were treated

20 as described on the left side of the panels. GFP and mCherry fluorescence and overlaid images of

21 sagittal brain sections are presented (three columns of the left side), from which square regions in the

22 cerebral cortex are magnified (three columns of the right side). Second systemic injection of PHP.eB

23 caused much greater mCherry expression than BR1N injection. To avoid halation of the fluorescence,

24 mCherry fluorescence in panels marked with hash (#) was obtained using a shorter exposure time.

25 Scale bars: 1 mm (left) and 100 μm (right).

26



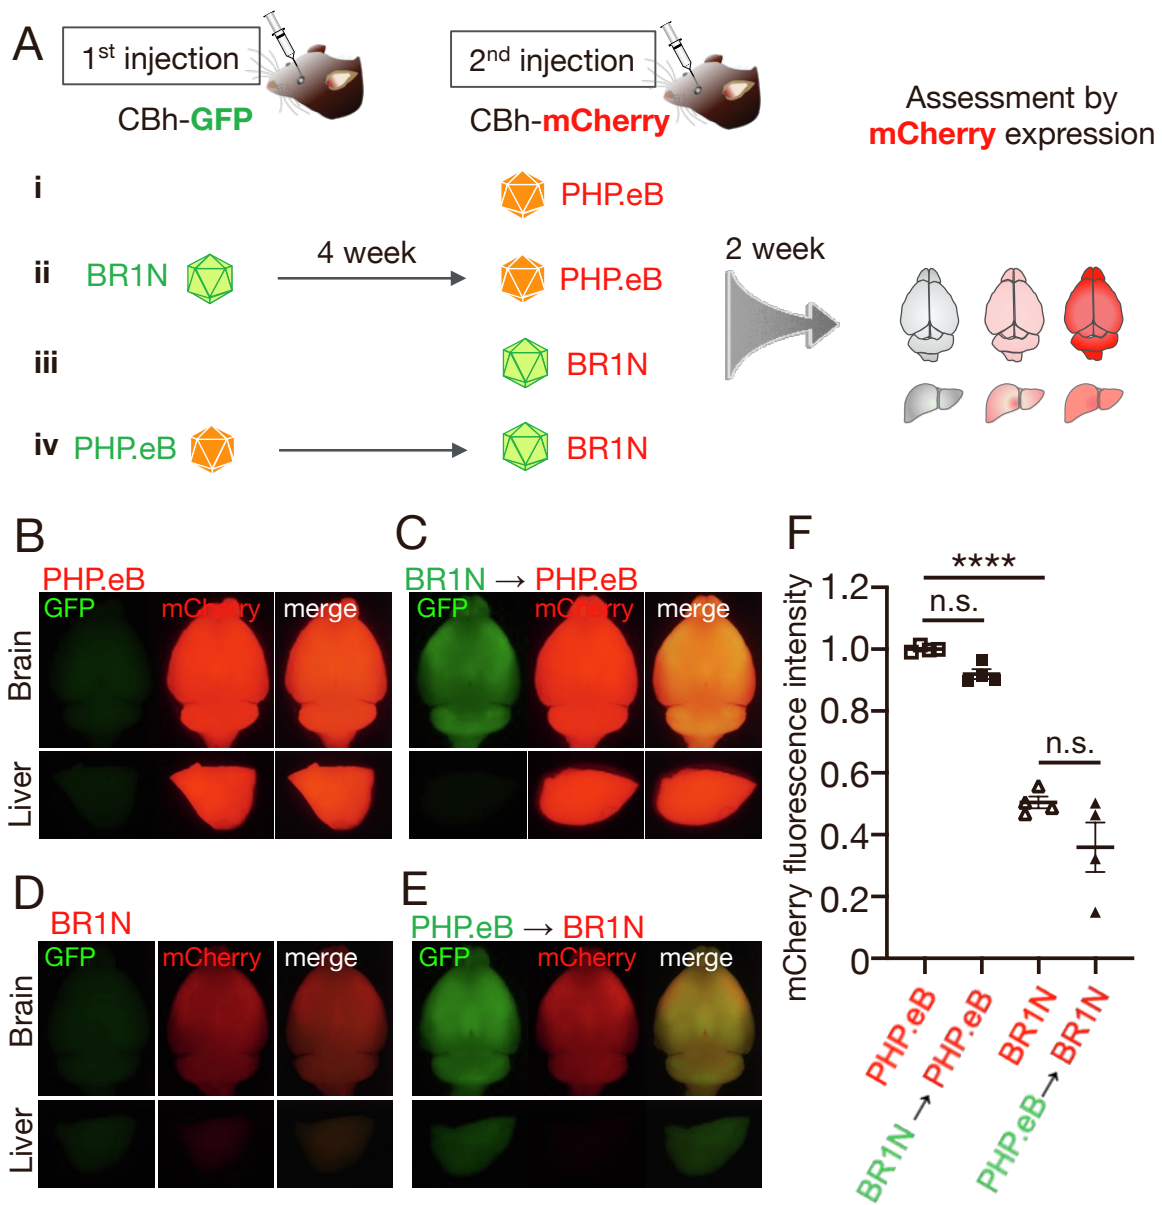

27

28 **Figure S4. Absence of cross-reaction of NAbs between AAV9 and BR1N with 4-week interval.** (A)

29 Diagram showing the experimental procedure. C57BL/6 mice received systemic AAV injections twice

30 with a 4-week interval: first injection (AAVs expressing GFP) was aimed to produce NAbs, whereas

31 second injection used different capsid AAVs expressing mCherry to test the cross-reactivity of the

32 NAbs produced by the 1<sup>st</sup> AAV injection. The cross-reactivity was assessed two weeks after the second

33 injection by mCherry fluorescence intensity. (B-E) Representative GFP and mCherry fluorescence

34 images of the whole brain and liver from mice virally treated as described above respective panels.

35 Fluorescence images of whole brains and livers from mice treated with mCherry-expressing PHP.eB

36 alone (**B**) or mCherry-expressing BR1N alone (**D**) were presented as controls. (**F**) Summarized graph  
37 showing the mCherry fluorescence intensity from whole brains. Asterisks show statistically significant  
38 differences (n = 4 mice per group, \*\*\*\* $P < 0.0001$  by one-way ANOVA with Bonferroni's post hoc test.  
39 n.s., not significant). All error bars show SEM.

40

A

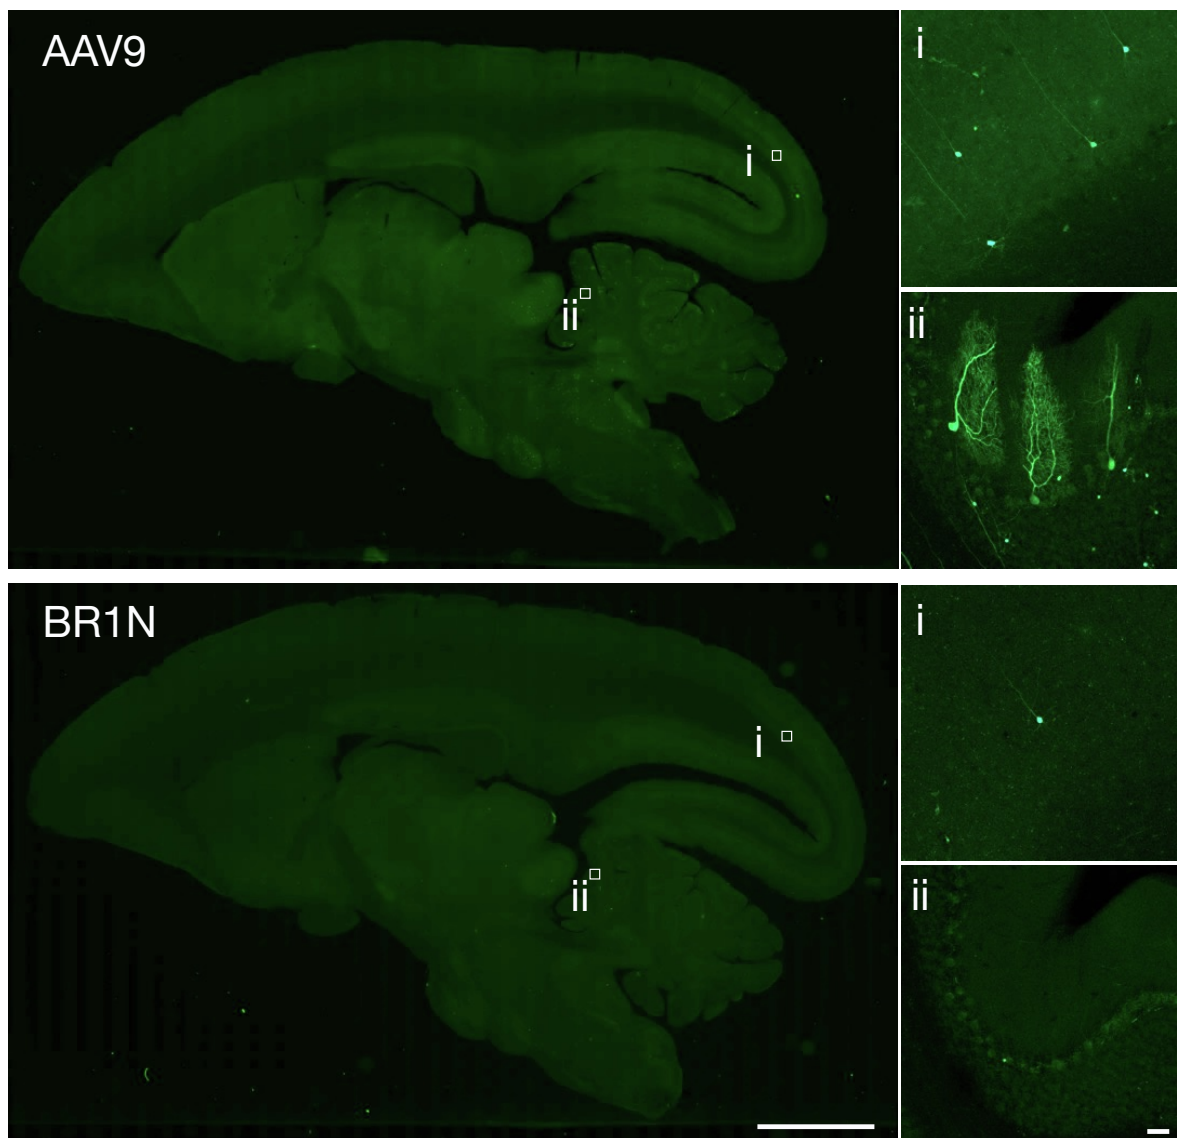

B

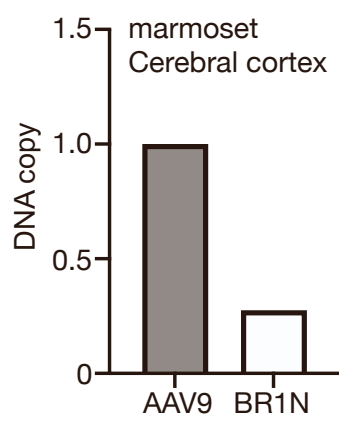

42 **Figure S5. No enhanced BBB penetration of intravenously infused BR1N in marmoset.** Male  
43 marmosets at 1.4 years of age received intravenous injection of AAV9 or BR1N ( $5 \times 10^{11}$  vg/kg) through  
44 the femoral vein. Four weeks after the injection, treated animals were sacrificed for histological  
45 analysis and quantitative real-time PCR. **(A)** Low-power images of sagittal brain sections from  
46 marmosets treated with AAV9 or BR1N (left). Images on the right (i and ii) are magnification of square  
47 regions in left low-power images. Scale bars: 5 mm (left) and 100  $\mu$ m (right). **(B)** Markedly less AAV  
48 genome DNA content in the cortical tissue from BR1N-treated marmoset than in the tissue from the  
49 AAV9-treated marmoset. Cerebral cortical tissues from marmosets treated with AAV9 or BR1N were  
50 subjected to quantitative real-time PCR.

51
